# Supplementary material for: The Hidden Dangers of Plant-Based Diets Affecting Bone Health: A Cross-Sectional Study with U.S. National Health and Nutrition Examination Survey (NHANES) Data from 2005–2018
Source: MDPI journal article supplement (doi:10.3390/nu15071794), 2023-04-06
Supplement: s1 [file s1]

**Supplementary Table S1.** Construction and score of plant-based diet indices

|                          | PDI            | hPDI           | uPDI           |
|--------------------------|----------------|----------------|----------------|
| Plant-based Food Groups  |                |                |                |
| Healthy                  |                |                |                |
| Whole grains             | Postive scores | Postive scores | Reverse scores |
| Fruits                   | Postive scores | Postive scores | Reverse scores |
| Vegetables               | Postive scores | Postive scores | Reverse scores |
| Nuts                     | Postive scores | Postive scores | Reverse scores |
| Legumes                  | Postive scores | Postive scores | Reverse scores |
| Tea and coffee           | Postive scores | Postive scores | Reverse scores |
| Less healthy             |                |                |                |
| Fruit juices             | Postive scores | Reverse scores | Postive scores |
| Refined grain            | Postive scores | Reverse scores | Postive scores |
| Potatoes                 | Postive scores | Reverse scores | Postive scores |
| Sugar                    | Postive scores | Reverse scores | Postive scores |
| Animal-based Food Groups |                |                |                |
| Animal fat               | Reverse scores | Reverse scores | Reverse scores |
| Dairy                    | Reverse scores | Reverse scores | Reverse scores |
| Egg                      | Reverse scores | Reverse scores | Reverse scores |
| Seafood                  | Reverse scores | Reverse scores | Reverse scores |
| Meat                     | Reverse scores | Reverse scores | Reverse scores |

Abbreviations: PDI, plant-based diet index; hPDI, healthful plant-based diet index; uPDI, unhealthful plant-based diet index.

**Supplementary Table S2.** Spearman correlation coefficients and 95% confidence intervals between three plant-based diet indexes and T-score.

|         | hPDI                        | PDI                  | uPDI              |
|---------|-----------------------------|----------------------|-------------------|
| T-Score | <b>-0.17 (-0.19, -0.16)</b> | -0.09 (-0.11, -0.08) | 0.03 (0.02, 0.05) |

The T-score with the highest correlation coefficient for three plant-based diet indexes was marked in **bold**. Abbreviations: PDI, plant-based diet index; hPDI, healthful plant-based diet index; uPDI, unhealthful plant-based diet index. All are significant at the level of <0.001 (2-tailed).

**Supplementary Table S3.** Test results of comparisons of two overlapping correlations in dependent groups

|                                                       | Hittner2003      | Zou2007               |
|-------------------------------------------------------|------------------|-----------------------|
|                                                       | <i>p</i> -value  | 95% CI                |
| <i>r</i> (T-Score, hPDI) vs. <i>r</i> (T-Score, PDI)  | <b>&lt;0.001</b> | <b>(-0.10, -0.06)</b> |
| <i>r</i> (T-Score, hPDI) vs. <i>r</i> (T-Score, uPDI) | <b>&lt;0.001</b> | <b>(-0.23, -0.17)</b> |

Hitter, May, and Silver's (2003) modification of Dunn and Clark's *z* (1969) using a back-transformed average Fisher's (1921) *Z* procedure, which is a significance test; Zou's (2007) confidence interval is a test based on the computation of confidence intervals. Results that reject the null hypothesis are marked in bold.

**Supplementary Table S4.** ORs and 95% CIs for bone loss, excluding participants with baseline history of taking anti-osteoporosis drugs and estrogenic drugs

|                       | Osteopenia vs Normal<br>OR (95% CI) | Osteoporosis vs Normal<br>OR (95% CI) |
|-----------------------|-------------------------------------|---------------------------------------|
| hPDI                  |                                     |                                       |
| Q1                    | 1 (Reference)                       | 1 (Reference)                         |
| Q2                    | <b>1.25 (1.04,1.50)</b>             | 0.84 (0.53,1.33)                      |
| Q3                    | 1.19 (0.98,1.44)                    | 0.82 (0.56,1.21)                      |
| Q4                    | <b>1.26 (1.03,1.54)</b>             | 1.13 (0.78,1.64)                      |
| Q5                    | <b>1.53 (1.26,1.87)</b>             | 1.03 (0.71,1.50)                      |
| Per 10-unit increment | <b>1.19 (1.09,1.29)</b>             | 1.04 (0.89,1.21)                      |
| PDI                   |                                     |                                       |
| Q1                    | 1 (Reference)                       | 1 (Reference)                         |
| Q2                    | 0.93 (0.78,1.12)                    | 0.80 (0.52,1.24)                      |
| Q3                    | 0.97 (0.80,1.18)                    | 0.88 (0.58,1.35)                      |
| Q4                    | 1.20 (0.99,1.45)                    | 1.04 (0.68,1.60)                      |
| Q5                    | <b>1.24 (1.04,1.49)</b>             | 0.96 (0.60,1.52)                      |
| Per 10-unit increment | 1.06 (0.97,1.17)                    | 0.94 (0.75,1.18)                      |
| uPDI                  |                                     |                                       |
| Q1                    | 1 (Reference)                       | 1 (Reference)                         |
| Q2                    | 1.03 (0.88,1.19)                    | 1.14 (0.75,1.72)                      |
| Q3                    | 1.16 (0.97,1.39)                    | 1.36 (0.92,2.01)                      |
| Q4                    | 1.08 (0.92,1.27)                    | <b>1.52 (1.03,2.25)</b>               |
| Q5                    | 0.97 (0.78,1.20)                    | 1.34 (0.95,1.88)                      |
| Per 10-unit increment | 0.99 (0.89,1.09)                    | <b>1.23 (1.01,1.50)</b>               |

Note: Fully adjusted model: age, sex, and ethnicity, education, marital status, PIR, BMI, smoking status, physical exercise, hypertension, T2DM, CKD, cancer, and history of fracture. Abbreviations: OR, odds ratio; 95% CI, 95% confidence interval. Anti-osteoporosis drugs: Etidronate; Alendronate; Risedronate; Ibandronate; Zoledronic acid; Alendronate; Risedronate; Denosumab. Estrogenic drugs: Conjugated estrogens Estrone; Ethinyl estradiol; Estradiol; Esterified estrogens; Estropipate estriol. Data with *P* values below 0.05 are presented in bold type.

**Supplementary Table S5.** ORs and 95% CIs for bone loss, additionally adjusting for menopausal status

|                       | Osteopenia vs Normal<br>OR (95% CI) | Osteoporosis vs Normal<br>OR (95% CI) |
|-----------------------|-------------------------------------|---------------------------------------|
| hPDI                  |                                     |                                       |
| Q1                    | 1 (Reference)                       | 1 (Reference)                         |
| Q2                    | <b>1.27 (1.06,1.51)</b>             | 0.90 (0.57,1.42)                      |
| Q3                    | <b>1.24 (1.02,1.50)</b>             | 0.97 (0.66,1.42)                      |
| Q4                    | 1.22 (1.00,1.49)                    | 0.98 (0.68,1.42)                      |
| Q5                    | <b>1.48 (1.22,1.80)</b>             | 1.05 (0.71,1.57)                      |
| Per 10-unit increment | <b>1.16 (1.08,1.26)</b>             | 1.02 (0.86,1.21)                      |
| PDI                   |                                     |                                       |
| Q1                    | 1 (Reference)                       | 1 (Reference)                         |

|                       |                         |                         |
|-----------------------|-------------------------|-------------------------|
| Q2                    | 0.93 (0.77,1.13)        | 0.81 (0.53,1.24)        |
| Q3                    | 1.00 (0.82,1.22)        | 1.03 (0.69,1.55)        |
| Q4                    | 1.13 (0.92,1.37)        | 1.09 (0.70,1.70)        |
| Q5                    | <b>1.20 (1.00,1.43)</b> | 1.00 (0.66,1.51)        |
| Per 10-unit increment | 1.05 (0.95,1.15)        | 0.96 (0.78,1.18)        |
| uPDI                  |                         |                         |
| Q1                    | 1 (Reference)           | 1 (Reference)           |
| Q2                    | 1.03 (0.88,1.20)        | 1.00 (0.68,1.47)        |
| Q3                    | 1.14 (0.95,1.35)        | 1.24 (0.84,1.83)        |
| Q4                    | 1.08 (0.93,1.25)        | <b>1.44 (1.01,2.06)</b> |
| Q5                    | 0.98 (0.79,1.22)        | <b>1.51 (1.05,2.17)</b> |
| Per 10-unit increment | 1.01 (0.93,1.10)        | <b>1.32 (1.01,1.59)</b> |

Note: Fully adjusted model: age, sex, and ethnicity, education, marital status, PIR, BMI, smoking status, physical exercise, hypertension, T2DM, CKD, cancer, and history of fracture. This multivariable model was additionally adjusted for menopausal status in sex. Abbreviations: OR, odds ratio; 95% CI, 95% confidence interval; PDI, plant-based diet index; hPDI, healthful plant-based diet index; uPDI, unhealthful plant-based diet index. Data with *P* values below 0.05 are presented in bold type.

**Supplementary Table S6.** ORs and 95% CIs for bone loss, additionally adjusting for corticosteroid usage

|                       | Osteopenia vs Normal<br>OR (95% CI) | Osteoporosis vs Normal<br>OR (95% CI) |
|-----------------------|-------------------------------------|---------------------------------------|
| hPDI                  |                                     |                                       |
| Q1                    | 1 (Reference)                       | 1 (Reference)                         |
| Q2                    | <b>1.25 (1.04,1.49)</b>             | 0.89 (0.56,1.41)                      |
| Q3                    | <b>1.21 (1.00,1.47)</b>             | 0.96 (0.65,1.40)                      |
| Q4                    | <b>1.23 (1.02,1.50)</b>             | 1.02 (0.71,1.46)                      |
| Q5                    | <b>1.49 (1.23,1.80)</b>             | 1.09 (0.74,1.61)                      |
| Per 10-unit increment | <b>1.17 (1.08,1.26)</b>             | 1.04 (0.88,1.22)                      |
| PDI                   |                                     |                                       |
| Q1                    | 1 (Reference)                       | 1 (Reference)                         |
| Q2                    | 0.93 (0.77,1.13)                    | 0.80 (0.52,1.22)                      |
| Q3                    | 1.00 (0.82,1.21)                    | 1.00 (0.67,1.49)                      |
| Q4                    | 1.14 (0.94,1.39)                    | 1.09 (0.71,1.68)                      |
| Q5                    | <b>1.21 (1.02,1.44)</b>             | 1.10 (0.68,1.51)                      |
| Per 10-unit increment | 1.05 (0.96,1.16)                    | 0.97 (0.79,1.19)                      |
| uPDI                  |                                     |                                       |
| Q1                    | 1 (Reference)                       | 1 (Reference)                         |
| Q2                    | 1.05 (0.91,1.22)                    | 1.03 (0.71,1.50)                      |
| Q3                    | 1.15 (0.97,1.37)                    | 1.28 (0.87,1.87)                      |
| Q4                    | 1.05 (0.91,1.22)                    | 1.41 (0.99,2.00)                      |
| Q5                    | 0.97 (0.79,1.20)                    | <b>1.49 (1.05,2.12)</b>               |

|                       |                  |                         |
|-----------------------|------------------|-------------------------|
| Per 10-unit increment | 1.00 (0.92,1.08) | <b>1.29 (1.08,1.55)</b> |
|-----------------------|------------------|-------------------------|

Note: Fully adjusted model: age, sex, and ethnicity, education, marital status, PIR, BMI, smoking status, physical exercise, hypertension, T2DM, CKD, cancer, and history of fracture. This multivariable model was additionally adjusted for corticosteroid usage. Abbreviations: OR, odds ratio; 95% CI, 95% confidence interval; PDI, plant-based diet index; hPDI, healthful plant-based diet index; uPDI, unhealthful plant-based diet index. Data with *P* values below 0.05 are presented in bold type.

**Supplementary Table S7.** ORs and 95% CIs for bone loss, additionally adjusting for dietary supplements

|                       | Osteopenia vs Normal<br>OR (95% CI) | Osteoporosis vs Normal<br>OR (95% CI) |
|-----------------------|-------------------------------------|---------------------------------------|
| hPDI                  |                                     |                                       |
| Q1                    | 1 (Reference)                       | 1 (Reference)                         |
| Q2                    | <b>1.24 (1.04,1.48)</b>             | 0.89 (0.56,1.41)                      |
| Q3                    | <b>1.22 (1.01,1.47)</b>             | 0.95 (0.64,1.39)                      |
| Q4                    | <b>1.25 (1.03,1.52)</b>             | 1.01 (0.70,1.45)                      |
| Q5                    | <b>1.50 (1.24,1.82)</b>             | 1.07 (0.72,1.59)                      |
| Per 10-unit increment | <b>1.17 (1.08,1.27)</b>             | 1.03 (0.88,1.21)                      |
| PDI                   |                                     |                                       |
| Q1                    | 1 (Reference)                       | 1 (Reference)                         |
| Q2                    | 0.93 (0.77,1.13)                    | 0.80 (0.53,1.23)                      |
| Q3                    | 1.00 (0.82,1.21)                    | 1.01 (0.67,1.50)                      |
| Q4                    | 1.14 (0.93,1.38)                    | 1.10 (0.71,1.71)                      |
| Q5                    | <b>1.22 (1.03,1.45)</b>             | 1.02 (0.68,1.53)                      |
| Per 10-unit increment | 1.06 (0.96,1.16)                    | 0.97 (0.79,1.20)                      |
| uPDI                  |                                     |                                       |
| Q1                    | 1 (Reference)                       | 1 (Reference)                         |
| Q2                    | 1.04 (0.90,1.21)                    | 1.03 (0.71,1.49)                      |
| Q3                    | 1.15 (0.97,1.36)                    | 1.28 (0.87,1.87)                      |
| Q4                    | 1.05 (0.90,1.21)                    | 1.39 (0.98,1.98)                      |
| Q5                    | 0.97 (0.78,1.19)                    | <b>1.49 (1.05,2.12)</b>               |
| Per 10-unit increment | 0.99 (0.92,1.08)                    | <b>1.29 (1.08,1.54)</b>               |

Note: Fully adjusted model: age, sex, and ethnicity, education, marital status, PIR, BMI, smoking status, physical exercise, hypertension, T2DM, CKD, cancer, and history of fracture. This multivariable model was additionally adjusted for dietary supplements (vitamin D and calcium). Abbreviations: OR, odds ratio; 95% CI, 95% confidence interval; PDI, plant-based diet index; hPDI, healthful plant-based diet index; uPDI, unhealthful plant-based diet index. Data with *P* values below 0.05 are presented in bold type.

**Supplementary Table S8.** E-values for the effect of plant-based dietary on bone loss (and its lower limit of 95% CI) in fully adjusted model

| E-Value for OR Estimate | E-Value for Lower limit of 95%CI | Variable | Level    | Group                | OR (95% CI)      |
|-------------------------|----------------------------------|----------|----------|----------------------|------------------|
| 1.47                    | 1.16                             | hPDI     | Q2 vs Q1 | Osteopenia vs Normal | 1.24 (1.04,1.48) |
| 1.43                    | 1.00                             | hPDI     | Q3 vs Q1 | Osteopenia vs Normal | 1.21 (1.00,1.47) |
| 1.47                    | 1.11                             | hPDI     | Q4 vs Q1 | Osteopenia vs Normal | 1.24 (1.02,1.51) |

|      |      |      |                       |                        |                  |
|------|------|------|-----------------------|------------------------|------------------|
| 1.75 | 1.47 | hPDI | Q5 vs Q1              | Osteopenia vs Normal   | 1.50 (1.24,1.81) |
| 1.38 | 1.24 | hPDI | Per 10-unit increment | Osteopenia vs Normal   | 1.17 (1.08,1.27) |
| 1.44 | 1.14 | PDI  | Q5 vs Q1              | Osteopenia vs Normal   | 1.22 (1.03,1.45) |
| 2.32 | 1.24 | uPDI | Q5 vs Q1              | Osteoporosis vs Normal | 1.48 (1.04,2.11) |
| 1.90 | 1.37 | uPDI | Per 10-unit increment | Osteoporosis vs Normal | 1.29 (1.08,1.54) |

Note: Fully adjusted model: age, sex, and ethnicity, education, marital status, PIR, BMI, smoking status, physical exercise, hypertension, T2DM, CKD, cancer, and history of fracture. Abbreviations: OR, odds ratio; 95% CI, 95% confidence interval; PDI, plant-based diet index; hPDI, healthful plant-based diet index; uPDI, unhealthful plant-based diet index.

|                         | PDI            | hPDI           | uPDI           |
|-------------------------|----------------|----------------|----------------|
| Plant-based Food Groups |                |                |                |
| Healthy                 |                |                |                |
| Whole grains            | Postive scores | Postive scores | Reverse scores |
| Fruits                  | Postive scores | Postive scores | Reverse scores |
| Vegetables              | Postive scores | Postive scores | Reverse scores |
| Nuts                    | Postive scores | Postive scores | Reverse scores |
| Legumes                 | Postive scores | Postive scores | Reverse scores |
| Tea and coffee          | Postive scores | Postive scores | Reverse scores |
| Less healthy            |                |                |                |

---

|                          |                |                |                |
|--------------------------|----------------|----------------|----------------|
| Fruit juices             | Postive scores | Reverse scores | Postive scores |
| Refined grain            | Postive scores | Reverse scores | Postive scores |
| Potatoes                 | Postive scores | Reverse scores | Postive scores |
| Sugar                    | Postive scores | Reverse scores | Postive scores |
| Animal-based Food Groups |                |                |                |
| Animal fat               | Reverse scores | Reverse scores | Reverse scores |
| Dairy                    | Reverse scores | Reverse scores | Reverse scores |
| Egg                      | Reverse scores | Reverse scores | Reverse scores |
| Seafood                  | Reverse scores | Reverse scores | Reverse scores |
| Meat                     | Reverse scores | Reverse scores | Reverse scores |
